# Supplementary material for: Estimating the completeness of death registration: An empirical method
Source: PubMed Central journal article supplement (PMC5976169; doi:10.1371/journal.pone.0197047), 2018-05-30
Supplement: pone.0197047.s001.pdf [file pone.0197047.s001.pdf]

**S1 Table. List of countries in dataset**

|                        |                  |                      |
|------------------------|------------------|----------------------|
| Albania                | Iran             | Serbia               |
| Algeria                | Iraq             | Singapore            |
| Argentina              | Ireland          | Slovakia             |
| Armenia                | Israel           | Slovenia             |
| Australia              | Italy            | Spain                |
| Austria                | Jamaica          | Sri Lanka            |
| Azerbaijan             | Japan            | Suriname             |
| Bahrain                | Jordan           | Sweden               |
| Barbados               | Kazakhstan       | Switzerland          |
| Belarus                | Kuwait           | Syria                |
| Belgium                | Kyrgyzstan       | Taiwan               |
| Belize                 | Latvia           | Tajikistan           |
| Bolivia                | Libya            | Thailand             |
| Bosnia and Herzegovina | Lithuania        | The Bahamas          |
| Brazil                 | Luxembourg       | Trinidad and Tobago  |
| Brunei                 | Macedonia        | Turkey               |
| Bulgaria               | Malaysia         | Turkmenistan         |
| Canada                 | Maldives         | Ukraine              |
| Cape Verde             | Malta            | United Arab Emirates |
| Chile                  | Mauritius        | United Kingdom       |
| Colombia               | Moldova          | United States        |
| Congo                  | Mongolia         | Uruguay              |
| Costa Rica             | Montenegro       | Uzbekistan           |
| Croatia                | Morocco          | Venezuela            |
| Cuba                   | Myanmar          |                      |
| Cyprus                 | Netherlands      |                      |
| Czech Republic         | New Zealand      |                      |
| Denmark                | Nicaragua        |                      |
| Dominican Republic     | Norway           |                      |
| Egypt                  | Oman             |                      |
| El Salvador            | Palestine        |                      |
| Estonia                | Panama           |                      |
| Fiji                   | Papua New Guinea |                      |
| Finland                | Paraguay         |                      |
| France                 | Peru             |                      |
| Georgia                | Philippines      |                      |
| Germany                | Poland           |                      |
| Greece                 | Portugal         |                      |
| Guatemala              | Puerto Rico      |                      |
| Guyana                 | Qatar            |                      |
| Honduras               | Romania          |                      |
| Hungary                | Russia           |                      |
| Iceland                | Saudi Arabia     |                      |
