# Supplementary material for: Estimating the completeness of death registration: An empirical method
Source: PubMed Central journal article supplement (PMC5976169; doi:10.1371/journal.pone.0197047), 2018-05-30
Supplement: pone.0197047.s002.pdf [file pone.0197047.s002.pdf]

**S2 Table. Random effects, Model 1, both sexes**

|                        |         |                  |         |                      |         |
|------------------------|---------|------------------|---------|----------------------|---------|
| Albania                | 0.2000  | Iran             | 0.2174  | Serbia               | -1.0113 |
| Algeria                | 0.1717  | Iraq             | -0.1976 | Singapore            | 0.5824  |
| Argentina              | 1.0838  | Ireland          | 0.3344  | Slovakia             | 0.4166  |
| Armenia                | 0.3338  | Israel           | -0.0098 | Slovenia             | -1.1617 |
| Australia              | 0.4170  | Italy            | -0.0518 | Spain                | 0.2440  |
| Austria                | 0.1004  | Jamaica          | -0.0084 | Sri Lanka            | 0.1461  |
| Azerbaijan             | 0.1193  | Japan            | 0.1074  | Suriname             | 0.0170  |
| Bahrain                | -1.3729 | Jordan           | -0.2577 | Sweden               | -0.2070 |
| Barbados               | 0.1618  | Kazakhstan       | -0.3473 | Switzerland          | 0.5159  |
| Belarus                | 0.1578  | Kuwait           | 1.0664  | Syria                | -0.1140 |
| Belgium                | -0.0184 | Kyrgyzstan       | -0.2087 | Taiwan               | 0.8155  |
| Belize                 | -0.3732 | Latvia           | 0.4640  | Tajikistan           | -0.0328 |
| Bolivia                | 0.1083  | Libya            | -0.2326 | Thailand             | -0.3807 |
| Bosnia and Herzegovina | -0.8148 | Lithuania        | 0.1309  | The Bahamas          | -1.2540 |
| Brazil                 | 0.2966  | Luxembourg       | 0.0259  | Trinidad and Tobago  | 0.2029  |
| Brunei                 | -0.0614 | Macedonia        | -1.0319 | Turkey               | 0.5234  |
| Bulgaria               | 0.0901  | Malaysia         | 0.1249  | Turkmenistan         | -0.1751 |
| Canada                 | 1.1465  | Maldives         | 0.1363  | Ukraine              | 0.2073  |
| Cape Verde             | 0.0743  | Malta            | -0.3192 | United Arab Emirates | -1.5400 |
| Chile                  | 0.8419  | Mauritius        | 0.6596  | United Kingdom       | 0.2271  |
| Colombia               | -0.0739 | Moldova          | -1.0196 | United States        | 0.8994  |
| Congo                  | -0.2040 | Mongolia         | -0.7242 | Uruguay              | 0.4178  |
| Costa Rica             | 0.6970  | Montenegro       | -0.5715 | Uzbekistan           | -0.1961 |
| Croatia                | -1.5261 | Morocco          | 0.1395  | Venezuela            | 1.5645  |
| Cuba                   | 0.2810  | Myanmar          | -0.1599 |                      |         |
| Cyprus                 | -0.7286 | Netherlands      | 0.4879  |                      |         |
| Czech Republic         | -0.2041 | New Zealand      | 0.3784  |                      |         |
| Denmark                | -0.0242 | Nicaragua        | 0.2464  |                      |         |
| Dominican Republic     | 0.1870  | Norway           | 0.2624  |                      |         |
| Egypt                  | 0.0907  | Oman             | -0.9823 |                      |         |
| El Salvador            | -0.0943 | Palestine        | -0.0127 |                      |         |
| Estonia                | -0.1456 | Panama           | 0.5594  |                      |         |
| Fiji                   | -1.0249 | Papua New Guinea | -0.1687 |                      |         |
| Finland                | -0.4415 | Paraguay         | 0.0246  |                      |         |
| France                 | 0.8033  | Peru             | 0.3055  |                      |         |
| Georgia                | -0.0369 | Philippines      | -0.0767 |                      |         |
| Germany                | 0.3033  | Poland           | 0.5143  |                      |         |
| Greece                 | 0.3059  | Portugal         | -0.1149 |                      |         |
| Guatemala              | 0.0633  | Puerto Rico      | 0.7522  |                      |         |
| Guyana                 | -0.5396 | Qatar            | -0.6170 |                      |         |
| Honduras               | -0.6664 | Romania          | 0.6079  |                      |         |
| Hungary                | -0.3753 | Russia           | 0.5332  |                      |         |
| Iceland                | -0.2385 | Saudi Arabia     | -0.7437 |                      |         |
