# Supplementary material for: Estimating the completeness of death registration: An empirical method
Source: PubMed Central journal article supplement (PMC5976169; doi:10.1371/journal.pone.0197047), 2018-05-30
Supplement: pone.0197047.s003.pdf [file pone.0197047.s003.pdf]

**S3 Table. Random effects, Model 2, both sexes**

|                        |         |                  |         |                      |         |
|------------------------|---------|------------------|---------|----------------------|---------|
| Albania                | 0.0947  | Iran             | -0.1810 | Serbia               | -0.9261 |
| Algeria                | 0.5955  | Iraq             | -0.6267 | Singapore            | 0.6483  |
| Argentina              | 1.4820  | Ireland          | 0.3181  | Slovakia             | 0.4400  |
| Armenia                | -0.0890 | Israel           | 0.1413  | Slovenia             | -1.3128 |
| Australia              | 0.5498  | Italy            | 0.0815  | Spain                | 0.3785  |
| Austria                | 0.1444  | Jamaica          | -0.5700 | Sri Lanka            | 0.4865  |
| Azerbaijan             | -0.2894 | Japan            | 0.2633  | Suriname             | -0.3602 |
| Bahrain                | -1.0147 | Jordan           | -0.5153 | Sweden               | -0.2712 |
| Barbados               | 0.4302  | Kazakhstan       | -0.5488 | Switzerland          | 0.6031  |
| Belarus                | -0.2705 | Kuwait           | 1.5877  | Syria                | -0.2949 |
| Belgium                | 0.0109  | Kyrgyzstan       | -0.2380 | Taiwan               | 0.9647  |
| Belize                 | -0.2406 | Latvia           | 0.4874  | Tajikistan           | -0.2669 |
| Bolivia                | 0.1259  | Libya            | 0.0851  | Thailand             | -0.9281 |
| Bosnia and Herzegovina | -0.7420 | Lithuania        | 0.1492  | The Bahamas          | -1.0747 |
| Brazil                 | 0.2211  | Luxembourg       | -0.0693 | Trinidad and Tobago  | -0.2343 |
| Brunei                 | 0.0696  | Macedonia        | -0.9134 | Turkey               | 0.2221  |
| Bulgaria               | 0.2281  | Malaysia         | 0.3575  | Turkmenistan         | 0.0057  |
| Canada                 | 1.3278  | Maldives         | 0.3824  | Ukraine              | -0.1058 |
| Cape Verde             | 0.3919  | Malta            | -0.2381 | United Arab Emirates | -1.2749 |
| Chile                  | 1.2106  | Mauritius        | 0.9305  | United Kingdom       | 0.2698  |
| Colombia               | -0.0513 | Moldova          | -1.4272 | United States        | 1.0286  |
| Congo                  | -0.1038 | Mongolia         | -0.6796 | Uruguay              | 0.7361  |
| Costa Rica             | 1.0279  | Montenegro       | -0.4671 | Uzbekistan           | -0.1867 |
| Croatia                | -1.5776 | Morocco          | -0.0864 | Venezuela            | 2.1006  |
| Cuba                   | 0.5251  | Myanmar          | -0.3804 |                      |         |
| Cyprus                 | -0.7848 | Netherlands      | 0.5337  |                      |         |
| Czech Republic         | -0.3351 | New Zealand      | 0.5048  |                      |         |
| Denmark                | -0.0832 | Nicaragua        | 0.3025  |                      |         |
| Dominican Republic     | -0.1237 | Norway           | 0.2446  |                      |         |
| Egypt                  | 0.1771  | Oman             | -0.7509 |                      |         |
| El Salvador            | -0.3848 | Palestine        | -0.4482 |                      |         |
| Estonia                | -0.1793 | Panama           | 0.9597  |                      |         |
| Fiji                   | -1.1177 | Papua New Guinea | -0.5042 |                      |         |
| Finland                | -0.5880 | Paraguay         | -0.0765 |                      |         |
| France                 | 0.9545  | Peru             | 0.1467  |                      |         |
| Georgia                | -0.5063 | Philippines      | -0.3174 |                      |         |
| Germany                | 0.3448  | Poland           | 0.5923  |                      |         |
| Greece                 | 0.4593  | Portugal         | -0.0033 |                      |         |
| Guatemala              | 0.3628  | Puerto Rico      | 1.0329  |                      |         |
| Guyana                 | -0.9640 | Qatar            | -0.5081 |                      |         |
| Honduras               | -1.0543 | Romania          | 0.8647  |                      |         |
| Hungary                | -0.3661 | Russia           | 0.5711  |                      |         |
| Iceland                | -0.3334 | Saudi Arabia     | -1.1690 |                      |         |
