# Supplementary material for: Estimating the completeness of death registration: An empirical method
Source: PubMed Central journal article supplement (PMC5976169; doi:10.1371/journal.pone.0197047), 2018-05-30
Supplement: pone.0197047.s004.pdf [file pone.0197047.s004.pdf]

**S4 Table. Random effects, Model 1, males**

|                        |         |                  |         |                      |         |
|------------------------|---------|------------------|---------|----------------------|---------|
| Albania                | 0.1570  | Iraq             | -0.1450 | Slovakia             | 0.1805  |
| Algeria                | 0.4780  | Ireland          | -0.0335 | Slovenia             | -0.8265 |
| Argentina              | 0.8900  | Israel           | -0.3762 | Spain                | 0.5046  |
| Armenia                | 0.2040  | Italy            | 0.2756  | Sri Lanka            | -0.1830 |
| Australia              | 0.7733  | Jamaica          | 0.2080  | Suriname             | 0.0702  |
| Austria                | 0.4858  | Japan            | 0.3077  | Sweden               | 0.1487  |
| Azerbaijan             | 0.0168  | Jordan           | -0.3136 | Switzerland          | 0.3162  |
| Bahrain                | -1.2815 | Kazakhstan       | -0.5496 | Syria                | -0.1549 |
| Barbados               | -0.3922 | Kuwait           | 1.1673  | Taiwan               | 0.5790  |
| Belarus                | -0.0279 | Kyrgyzstan       | -0.2311 | Tajikistan           | 0.0445  |
| Belgium                | 0.3462  | Latvia           | 0.1166  | Thailand             | -0.4706 |
| Belize                 | -0.4551 | Libya            | 0.1100  | The Bahamas          | -1.1970 |
| Bolivia                | 0.1495  | Lithuania        | 0.4054  | Trinidad and Tobago  | 0.1251  |
| Bosnia and Herzegovina | -0.7417 | Luxembourg       | -0.5187 | Turkey               | 0.3540  |
| Brazil                 | 0.2719  | Macedonia        | -1.0371 | Turkmenistan         | -0.1483 |
| Brunei                 | -0.2693 | Malaysia         | 0.0147  | Ukraine              | 0.1736  |
| Bulgaria               | 0.3709  | Malta            | -0.5082 | United Arab Emirates | -1.5067 |
| Canada                 | 1.3417  | Mauritius        | 0.2052  | United Kingdom       | 0.2939  |
| Cape Verde             | -0.5196 | Moldova          | -0.9525 | United States        | 1.1507  |
| Chile                  | 1.0393  | Mongolia         | -0.6402 | Uruguay              | 0.3279  |
| Colombia               | -0.0749 | Montenegro       | 0.0837  | Uzbekistan           | -0.2438 |
| Costa Rica             | 0.7500  | Morocco          | 0.4637  | Venezuela            | 1.4527  |
| Croatia                | -1.5203 | Myanmar          | -0.0798 |                      |         |
| Cuba                   | 0.3195  | Netherlands      | 0.6341  |                      |         |
| Cyprus                 | -0.5878 | New Zealand      | 0.2355  |                      |         |
| Czech Republic         | -0.0606 | Nicaragua        | 0.3307  |                      |         |
| Denmark                | 0.3451  | Norway           | 0.5205  |                      |         |
| Dominican Republic     | 0.1894  | Oman             | -0.6978 |                      |         |
| Egypt                  | 0.1982  | Palestine        | -0.0270 |                      |         |
| El Salvador            | -0.1474 | Panama           | 0.4858  |                      |         |
| Estonia                | -0.0271 | Papua New Guinea | -0.2093 |                      |         |
| Fiji                   | -1.0460 | Paraguay         | 0.1080  |                      |         |
| Finland                | -0.4913 | Peru             | 0.3440  |                      |         |
| France                 | 0.2385  | Philippines      | -0.0975 |                      |         |
| Georgia                | -0.4013 | Poland           | 0.7964  |                      |         |
| Germany                | 0.3429  | Portugal         | 0.0181  |                      |         |
| Greece                 | -0.0562 | Puerto Rico      | -0.0370 |                      |         |
| Guatemala              | 0.4118  | Qatar            | -0.6030 |                      |         |
| Guyana                 | -0.5924 | Romania          | 0.5581  |                      |         |
| Honduras               | -0.4895 | Russia           | 0.8658  |                      |         |
| Hungary                | -0.2866 | Saudi Arabia     | -0.4669 |                      |         |
| Iceland                | -0.8633 | Serbia           | -1.0104 |                      |         |
| Iran                   | 0.1364  | Singapore        | 0.1646  |                      |         |
