# Supplementary material for: Estimating the completeness of death registration: An empirical method
Source: PubMed Central journal article supplement (PMC5976169; doi:10.1371/journal.pone.0197047), 2018-05-30
Supplement: pone.0197047.s005.pdf [file pone.0197047.s005.pdf]

**S5 Table. Random effects, Model 2, males**

|                        |         |                  |         |                      |         |
|------------------------|---------|------------------|---------|----------------------|---------|
| Albania                | 0.0417  | Iraq             | -0.5210 | Slovakia             | 0.2042  |
| Algeria                | 0.9400  | Ireland          | -0.0342 | Slovenia             | -0.9779 |
| Argentina              | 1.2187  | Israel           | -0.2263 | Spain                | 0.5858  |
| Armenia                | -0.2048 | Italy            | 0.3591  | Sri Lanka            | 0.1092  |
| Australia              | 0.8942  | Jamaica          | -0.2595 | Suriname             | -0.2715 |
| Austria                | 0.5206  | Japan            | 0.3716  | Sweden               | 0.0994  |
| Azerbaijan             | -0.3572 | Jordan           | -0.5463 | Switzerland          | 0.3727  |
| Bahrain                | -0.8876 | Kazakhstan       | -0.7553 | Syria                | -0.3077 |
| Barbados               | -0.1386 | Kuwait           | 1.6742  | Taiwan               | 0.6925  |
| Belarus                | -0.4490 | Kyrgyzstan       | -0.2469 | Tajikistan           | -0.1328 |
| Belgium                | 0.3713  | Latvia           | 0.0869  | Thailand             | -0.9784 |
| Belize                 | -0.2999 | Libya            | 0.4544  | The Bahamas          | -1.0203 |
| Bolivia                | 0.1651  | Lithuania        | 0.3966  | Trinidad and Tobago  | -0.2529 |
| Bosnia and Herzegovina | -0.6461 | Luxembourg       | -0.6339 | Turkey               | 0.0313  |
| Brazil                 | 0.1852  | Macedonia        | -0.8892 | Turkmenistan         | 0.0427  |
| Brunei                 | -0.1646 | Malaysia         | 0.2540  | Ukraine              | -0.1543 |
| Bulgaria               | 0.5394  | Malta            | -0.4010 | United Arab Emirates | -1.1605 |
| Canada                 | 1.4899  | Mauritius        | 0.4427  | United Kingdom       | 0.3437  |
| Cape Verde             | -0.2341 | Moldova          | -1.2877 | United States        | 1.2448  |
| Chile                  | 1.3688  | Mongolia         | -0.5564 | Uruguay              | 0.5863  |
| Colombia               | -0.0747 | Montenegro       | 0.2578  | Uzbekistan           | -0.2255 |
| Costa Rica             | 1.0560  | Morocco          | 0.1963  | Venezuela            | 1.9169  |
| Croatia                | -1.5827 | Myanmar          | -0.3049 |                      |         |
| Cuba                   | 0.5580  | Netherlands      | 0.6861  |                      |         |
| Cyprus                 | -0.5889 | New Zealand      | 0.3478  |                      |         |
| Czech Republic         | -0.1803 | Nicaragua        | 0.3823  |                      |         |
| Denmark                | 0.3320  | Norway           | 0.5138  |                      |         |
| Dominican Republic     | -0.0846 | Oman             | -0.3999 |                      |         |
| Egypt                  | 0.2989  | Palestine        | -0.3928 |                      |         |
| El Salvador            | -0.4360 | Panama           | 0.8399  |                      |         |
| Estonia                | -0.0985 | Papua New Guinea | -0.5313 |                      |         |
| Fiji                   | -1.0901 | Paraguay         | 0.0513  |                      |         |
| Finland                | -0.6617 | Peru             | 0.2186  |                      |         |
| France                 | 0.3117  | Philippines      | -0.3083 |                      |         |
| Georgia                | -0.8756 | Poland           | 0.8579  |                      |         |
| Germany                | 0.3584  | Portugal         | 0.0910  |                      |         |
| Greece                 | 0.0387  | Puerto Rico      | 0.1083  |                      |         |
| Guatemala              | 0.7173  | Qatar            | -0.4264 |                      |         |
| Guyana                 | -0.9451 | Romania          | 0.8011  |                      |         |
| Honduras               | -0.8080 | Russia           | 0.8760  |                      |         |
| Hungary                | -0.2635 | Saudi Arabia     | -0.8046 |                      |         |
| Iceland                | -0.9390 | Serbia           | -0.8889 |                      |         |
| Iran                   | -0.2088 | Singapore        | 0.2131  |                      |         |
