# Supplementary material for: Estimating the completeness of death registration: An empirical method
Source: PubMed Central journal article supplement (PMC5976169; doi:10.1371/journal.pone.0197047), 2018-05-30
Supplement: pone.0197047.s006.pdf [file pone.0197047.s006.pdf]

**S6 Table. Random effects, Model 1, females**

|                        |         |                  |         |                      |         |
|------------------------|---------|------------------|---------|----------------------|---------|
| Albania                | 0.3585  | Ireland          | -0.0803 | Slovakia             | 0.5133  |
| Algeria                | 0.0473  | Israel           | 0.1373  | Slovenia             | -1.0807 |
| Argentina              | 0.7192  | Italy            | 0.1950  | Spain                | 0.3409  |
| Armenia                | 0.6396  | Jamaica          | -0.2551 | Sri Lanka            | 0.9982  |
| Australia              | 0.4297  | Japan            | 0.3899  | Suriname             | 0.0446  |
| Austria                | 0.1247  | Jordan           | -0.5191 | Sweden               | -0.1613 |
| Azerbaijan             | 0.2745  | Kazakhstan       | -0.1139 | Switzerland          | 0.3416  |
| Bahrain                | -1.4168 | Kuwait           | 0.6684  | Syria                | -0.0759 |
| Barbados               | -0.1693 | Kyrgyzstan       | -0.0117 | Taiwan               | 0.6906  |
| Belarus                | 0.5854  | Latvia           | 0.4024  | Tajikistan           | -0.1154 |
| Belgium                | -0.0373 | Libya            | -0.5064 | Thailand             | -0.2841 |
| Belize                 | -0.2275 | Lithuania        | -0.1122 | The Bahamas          | -1.2689 |
| Bolivia                | 0.0419  | Luxembourg       | -0.4862 | Trinidad and Tobago  | 0.7493  |
| Bosnia and Herzegovina | -0.7243 | Macedonia        | -0.8222 | Turkey               | 0.7250  |
| Brazil                 | 0.4513  | Malaysia         | 0.3321  | Turkmenistan         | -0.0679 |
| Bulgaria               | 0.3175  | Maldives         | -0.2575 | Ukraine              | 0.6511  |
| Canada                 | 0.9255  | Malta            | -0.4095 | United Arab Emirates | -1.4188 |
| Cape Verde             | 0.6302  | Mauritius        | 0.5314  | United Kingdom       | 0.1332  |
| Chile                  | 0.6820  | Moldova          | -0.9159 | United States        | 1.0710  |
| Colombia               | -0.0050 | Mongolia         | -0.6790 | Uruguay              | 0.6588  |
| Costa Rica             | 0.6881  | Montenegro       | -0.8182 | Uzbekistan           | -0.3991 |
| Croatia                | -1.1031 | Morocco          | -0.0732 | Venezuela            | 1.7568  |
| Cuba                   | 0.2212  | Myanmar          | -0.1452 |                      |         |
| Cyprus                 | -1.1047 | Netherlands      | 0.3750  |                      |         |
| Czech Republic         | -0.2166 | New Zealand      | 0.1828  |                      |         |
| Denmark                | -0.2802 | Nicaragua        | 0.1586  |                      |         |
| Dominican Republic     | 0.1206  | Norway           | 0.1516  |                      |         |
| Egypt                  | 0.1291  | Oman             | -1.2523 |                      |         |
| El Salvador            | 0.0276  | Palestine        | -0.1556 |                      |         |
| Estonia                | 0.1282  | Panama           | 0.6239  |                      |         |
| Fiji                   | -0.8543 | Papua New Guinea | -0.2987 |                      |         |
| Finland                | -0.5019 | Paraguay         | -0.0898 |                      |         |
| France                 | 0.6269  | Peru             | 0.2411  |                      |         |
| Georgia                | 0.4297  | Philippines      | -0.0088 |                      |         |
| Germany                | 0.3284  | Poland           | 0.3883  |                      |         |
| Greece                 | 0.4460  | Portugal         | 0.0553  |                      |         |
| Guatemala              | 0.0689  | Puerto Rico      | 0.7616  |                      |         |
| Guyana                 | -0.4746 | Qatar            | -0.3299 |                      |         |
| Honduras               | -0.9435 | Romania          | 0.5298  |                      |         |
| Hungary                | -0.1819 | Russia           | 0.5728  |                      |         |
| Iceland                | -0.7510 | Saudi Arabia     | -1.3151 |                      |         |
| Iran                   | 0.1810  | Serbia           | -1.1828 |                      |         |
| Iraq                   | -0.3538 | Singapore        | 0.0617  |                      |         |
