# Supplementary material for: Estimating the completeness of death registration: An empirical method
Source: PubMed Central journal article supplement (PMC5976169; doi:10.1371/journal.pone.0197047), 2018-05-30
Supplement: pone.0197047.s007.pdf [file pone.0197047.s007.pdf]

**S7 Table. Random effects, Model 2, females**

|                        |         |                  |         |                      |         |
|------------------------|---------|------------------|---------|----------------------|---------|
| Albania                | 0.2838  | Ireland          | -0.1321 | Slovakia             | 0.5529  |
| Algeria                | 0.4291  | Israel           | 0.2435  | Slovenia             | -1.1943 |
| Argentina              | 1.0777  | Italy            | 0.3113  | Spain                | 0.4635  |
| Armenia                | 0.2739  | Jamaica          | -0.8098 | Sri Lanka            | 1.3715  |
| Australia              | 0.5237  | Japan            | 0.5598  | Suriname             | -0.2735 |
| Austria                | 0.1293  | Jordan           | -0.7187 | Sweden               | -0.2607 |
| Azerbaijan             | -0.0574 | Kazakhstan       | -0.2326 | Switzerland          | 0.3837  |
| Bahrain                | -1.1079 | Kuwait           | 1.1050  | Syria                | -0.2406 |
| Barbados               | 0.0176  | Kyrgyzstan       | -0.0029 | Taiwan               | 0.8554  |
| Belarus                | 0.2419  | Latvia           | 0.4253  | Tajikistan           | -0.3325 |
| Belgium                | -0.0394 | Libya            | -0.2186 | Thailand             | -0.7361 |
| Belize                 | -0.0567 | Lithuania        | -0.0567 | The Bahamas          | -1.0565 |
| Bolivia                | 0.0333  | Luxembourg       | -0.6127 | Trinidad and Tobago  | 0.3682  |
| Bosnia and Herzegovina | -0.6482 | Macedonia        | -0.7071 | Turkey               | 0.4702  |
| Brazil                 | 0.4268  | Malaysia         | 0.5557  | Turkmenistan         | 0.1156  |
| Bulgaria               | 0.4249  | Maldives         | -0.1490 | Ukraine              | 0.3978  |
| Canada                 | 1.0659  | Malta            | -0.4024 | United Arab Emirates | -1.1476 |
| Cape Verde             | 1.0385  | Mauritius        | 0.7894  | United Kingdom       | 0.1229  |
| Chile                  | 1.0129  | Moldova          | -1.2689 | United States        | 1.1798  |
| Colombia               | 0.0625  | Mongolia         | -0.6014 | Uruguay              | 0.9698  |
| Costa Rica             | 0.9678  | Montenegro       | -0.7465 | Uzbekistan           | -0.4026 |
| Croatia                | -1.1105 | Morocco          | -0.2037 | Venezuela            | 2.2453  |
| Cuba                   | 0.4160  | Myanmar          | -0.3800 |                      |         |
| Cyprus                 | -1.2030 | Netherlands      | 0.3808  |                      |         |
| Czech Republic         | -0.3461 | New Zealand      | 0.2581  |                      |         |
| Denmark                | -0.3754 | Nicaragua        | 0.2098  |                      |         |
| Dominican Republic     | -0.1677 | Norway           | 0.0968  |                      |         |
| Egypt                  | 0.2239  | Oman             | -1.0219 |                      |         |
| El Salvador            | -0.1710 | Palestine        | -0.5624 |                      |         |
| Estonia                | 0.1440  | Panama           | 0.9851  |                      |         |
| Fiji                   | -0.9038 | Papua New Guinea | -0.6527 |                      |         |
| Finland                | -0.6142 | Paraguay         | -0.2143 |                      |         |
| France                 | 0.7365  | Peru             | 0.0734  |                      |         |
| Georgia                | 0.0332  | Philippines      | -0.1849 |                      |         |
| Germany                | 0.3320  | Poland           | 0.4824  |                      |         |
| Greece                 | 0.5706  | Portugal         | 0.1550  |                      |         |
| Guatemala              | 0.3657  | Puerto Rico      | 1.0508  |                      |         |
| Guyana                 | -0.8232 | Qatar            | -0.2355 |                      |         |
| Honduras               | -1.3083 | Romania          | 0.7424  |                      |         |
| Hungary                | -0.1538 | Russia           | 0.6572  |                      |         |
| Iceland                | -0.8882 | Saudi Arabia     | -1.7123 |                      |         |
| Iran                   | -0.1730 | Serbia           | -1.1238 |                      |         |
| Iraq                   | -0.7732 | Singapore        | 0.1061  |                      |         |
